# Supplementary material for: In Vitro Assessment of Bio-Functional Properties from Lactiplantibacillus plantarum Strains
Source: MDPI journal article supplement (doi:10.3390/cimb44050158), 2022-05-19
Supplement: s1 [file s1]

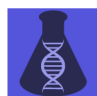**Table S1.** LFM medium composition. Yeast Nitrogen Base (Sigma-Aldrich, Merck KGaA, Darmstadt, GE) supplemented with:

|                        |         |
|------------------------|---------|
| Pyridoxal-5'-phosphate | 40 mg/L |
| D-Glucose              | 20g/L   |
| L-Cysteine             | 100 µM  |
| L-Phenylalanine        | 100 µM  |
| L-Histidine            | 100 µM  |
| L-Glycine              | 100 µM  |
| L-Glutamic acid        | 100 µM  |

**Table S2.** Antimicrobial activity at 37 °C by cell-free supernatant (CFS) from the five *Lp. plantarum* strains against different indicator bacteria. The data (mean ± SD; n = 3) are expressed as zone of inhibition-ZOI (mm). Different lowercase letters (a–c) in each row indicate significant differences ( $p < 0.05$ ).

| Indicator bacteria              | <i>Lp. plantarum</i> strains |                         |                         |                         |                         |                         |
|---------------------------------|------------------------------|-------------------------|-------------------------|-------------------------|-------------------------|-------------------------|
|                                 | LP 8                         | LP 25                   | LP 86                   | LP 95                   | LP 100                  | ATCC 14917              |
| <i>P. aeruginosa</i> ATCC 27853 | 24.0 ± 3.0 <sup>a</sup>      | 21.0 ± 1.0 <sup>a</sup> | 20.0 ± 2.0 <sup>a</sup> | 19.0 ± 2.0 <sup>a</sup> | 18.0 ± 3.0 <sup>a</sup> | 20.0 ± 2.0 <sup>a</sup> |
| <i>E. coli</i> ATCC 11775       | 9.0 ± 3.0 <sup>a</sup>       | 0.0 ± 0.0 <sup>b</sup>  | 9.0 ± 2.0 <sup>a</sup>  | 9.0 ± 1.0 <sup>a</sup>  | 10.0 ± 1.0 <sup>a</sup> | 7.0 ± 3.0 <sup>a</sup>  |
| <i>P. mirabilis</i> ATCC 29906  | 8.0 ± 2.0 <sup>b</sup>       | 0.0 ± 0.0 <sup>c</sup>  | 13.0 ± 2.0 <sup>a</sup> | 12.0 ± 3.0 <sup>a</sup> | 14.0 ± 1.0 <sup>a</sup> | 9.0 ± 3.0 <sup>a</sup>  |
| <i>E. faecalis</i> ATCC 29212   | 8.0 ± 1.0 <sup>a</sup>       | 9.0 ± 1.0 <sup>a</sup>  | 7.0 ± 2.0 <sup>a</sup>  | 10.0 ± 1.0 <sup>a</sup> | 9.0 ± 3.0 <sup>a</sup>  | 7.0 ± 2.0 <sup>a</sup>  |
| <i>S. aureus</i> ATCC 29213     | 0.0 ± 0.0 <sup>c</sup>       | 0.0 ± 0.0 <sup>c</sup>  | 7.0 ± 1.0 <sup>a</sup>  | 8.0 ± 1.0 <sup>a</sup>  | 8.0 ± 2.0 <sup>a</sup>  | 4.0 ± 2.0 <sup>b</sup>  |

**Table S3.** GABA production (pmol GABA/µg BSA Eq.) from the five *Lp. plantarum* strains grown in LFM medium with and without L-glutamic acid (GLU). All values are expressed as mean ± standard deviation (n = 3). Different lowercase letters (a–d) in each row indicate significant differences ( $p < 0.05$ ).

| GABA production of <i>Lp. plantarum</i> strains |                          |                          |                          |                          |                          |                          |
|-------------------------------------------------|--------------------------|--------------------------|--------------------------|--------------------------|--------------------------|--------------------------|
| LFM medium                                      | LP 8                     | LP 25                    | LP 86                    | LP 95                    | LP 100                   | ATCC 14917               |
| without GLU                                     | 0.068±0.011 <sup>b</sup> | 0.060±0.011 <sup>b</sup> | 0.047±0.008 <sup>b</sup> | 0.055±0.008 <sup>b</sup> | 0.088±0.006 <sup>a</sup> | 0.116±0.031 <sup>a</sup> |
| with GLU                                        | 0.781±0.055 <sup>c</sup> | 0.345±0.026 <sup>d</sup> | 1.004±0.063 <sup>c</sup> | 2.227±0.118 <sup>a</sup> | 1.350±0.111 <sup>b</sup> | 1.204±0.134 <sup>b</sup> |
